# Supplementary material for: Associations of Blood and Performance Parameters with Signs of Periodontal Inflammation in Young Elite Athletes—An Explorative Study
Source: MDPI journal article supplement (doi:10.3390/jcm11175161), 2022-08-31
Supplement: s1 [file s1]

**Supplementary Table S1. Multivariate linear regression analysis of the influence of some blood parameters on gingival inflammation (PBI).**

| <b>Model</b> | <b><math>\beta</math></b> | <b>Confidence interval</b> | <b>p-Value</b> |
|--------------|---------------------------|----------------------------|----------------|
| 1 Urea       | -0.215                    | -0.077 to 0.004            | 0.08           |
| Uric acid    | 0.229                     | 0.000 to 0.002             | 0.064          |
| Thrombocytes | -0.172                    | -0.002 to 0.000            | 0.158          |
| 2 Urea       | -0.215                    | -0.077 to 0.004            | 0.078          |
| Uric acid    | 0.264                     | 0.000 to 0.002             | 0.032          |

**Supplementary Table S2. Echocardiographic parameters and their associations with periodontal health (PBI and PSI).**

|                       | n  | Total         | Association to PBI |               |      | Association to PSI |               |      |
|-----------------------|----|---------------|--------------------|---------------|------|--------------------|---------------|------|
|                       |    |               | PBI<0.42           | PBI≥0.42      | p    | PSI<3              | PSI≥3         | p    |
| <b>HV_abs</b> (ml)    | 39 | 831.2 ± 167.5 | 807.4 ± 153.5      | 848.1 ± 177.7 | 0.42 | 817.7 ± 156.5      | 848.9 ± 183.5 | 0.54 |
| <b>HV_rel</b> (ml/kg) | 39 | 12.8 ± 1.4    | 12.8 ± 1.5         | 12.9 ± 1.4    | 0.78 | 12.8 ± 1.4         | 12.8 ± 1.5    | 1.00 |
| <b>LA</b> (cm)        | 38 | 3.6 ± 0.4     | 3.5 ± 0.4          | 3.7 ± 0.4     | 0.08 | 3.7 ± 0.4          | 3.6 ± 0.4     | 0.51 |
| <b>LVEDd</b> (cm)     | 40 | 5.0 ± 0.4     | 4.9 ± 0.4          | 5.0 ± 0.4     | 0.48 | 5.0 ± 0.4          | 5.0 ± 0.5     | 0.85 |
| <b>TAPSE</b> (cm)     | 27 | 2.5 ± 0.4     | 2.4 ± 0.4          | 2.6 ± 0.4     | 0.10 | 2.5 ± 0.4          | 2.5 ± 0.5     | 0.58 |

Abbreviations: HV\_abs: absolute heart volume; HV\_rel: relative heart volume; LA: left atrial size; LVEDd: left ventricular end-diastolic dimension; PBI: Papillary Bleeding Index; PSI: Periodontal Screening Index with PSI≥3 indicating increased probing depths as a sign of periodontitis; TAPSE: tricuspid annular plane systolic excursion.
